# Supplementary material
Source: MDPI journal article supplement (https://www.mdpi.com/1424-2818/15/12/1217)
Supplement: s1 [file s1]

# Effects of Clothianidin Pesticide Application on the Strength of Honey Bee Colonies and Stress-Related Genes in the Vicinity of Rice Fields in the Republic of Korea

## Supplementary materials

**Table S1:** Primer of the genes for qPCR [32].

| Classification                        | Name            |   | Primer Sequence (5'-3') | bp  | Accession No |
|---------------------------------------|-----------------|---|-------------------------|-----|--------------|
| <i>Phase I detoxification genes</i>   | <i>CYP9Q1</i>   | F | AACATCCTGGCCAAGTGCAG    | 94  | LOC410492    |
|                                       |                 | R | CATTCTTAGCGACCGGGTTG    |     |              |
|                                       | <i>CYP9Q2</i>   | F | GCATAGGGAACAGATTTCGCG   | 104 | LOC408452    |
|                                       |                 | R | TTCCAACGGGATTCTGTCC     |     |              |
|                                       | <i>CYP9Q3</i>   | F | GAGGAAGTGCATTGGCGAAC    | 89  | LOC408453    |
|                                       |                 | R | AGCCGATCCTCACGTTACAC    |     |              |
|                                       | <i>CYP6AS3</i>  | F | GAGGATGATGCTTTCGCCAG    | 91  | LOC726690    |
|                                       |                 | R | AATGCGCAAAACGAGCACCG    |     |              |
|                                       | <i>CYP336A1</i> | F | AACACGGAGGCGTGTTAACG    | 120 | LOC724211    |
|                                       |                 | R | CGTCCGTGCATATTTGCCC     |     |              |
|                                       | <i>CbE</i>      | F | GCCGATGTCCCGGTCATAAT    | 109 | LOC726134    |
|                                       |                 | R | CGTGCGTGGGTAGATATTCG    |     |              |
|                                       | <i>Este4</i>    | F | CGCCCCGATCTTTGCATGT     | 104 | LOC409801    |
|                                       |                 | R | TTTCGCTGATCGGCTCGTCT    |     |              |
| <i>Phase II detoxification genes</i>  | <i>Gstd1</i>    | F | AAACATCGGCACGGCGCTAT    | 109 | LOC409490    |
|                                       |                 | R | GGAGACAGTGGATACGATGC    |     |              |
|                                       | <i>Gsts1</i>    | F | TACGGTTCCAATGATGAAGAAGC | 111 | LOC552304    |
|                                       |                 | R | CTTGAATGCATGATCCTTTTCCC |     |              |
|                                       | <i>Gsts4</i>    | F | AGCTGCCCCACGTTGGAAATC   | 121 | LOC411045    |
|                                       |                 | R | GCGTCGATCTGCAACGTATC    |     |              |
| <i>Phase III detoxification genes</i> | <i>ABCCS</i>    | F | CGCTTTGCGGATTAGCAACG    | 102 | LOC410944    |
|                                       |                 | R | GAAGGAGGAACGCGTTTGTG    |     |              |
|                                       | <i>ABCD1</i>    | F | GTAAGCCTTGAGGCAGAAGC    | 96  | LOC411685    |
|                                       |                 | R | TTTCGCAAGAGATGCCACCC    |     |              |
|                                       | <i>ABCG20</i>   | F | CGTGTGGGCTATATGCCACA    | 96  | LOC724865    |
|                                       |                 | R | TGTACTCATGCCAGCACACC    |     |              |
| <i>Heat shock response genes</i>      | <i>Hsp70</i>    | F | ATCAACCTGGCGTCTTGATTG   | 118 | LOC410620    |
|                                       |                 | R | TGAGGTACACCTCTAGGTGC    |     |              |
|                                       | <i>Hsp90</i>    | F | GCGACAGAATGAAGTGCCATG   | 146 | LOC408928    |
|                                       |                 | R | CAGAATCAAGTGGCAGGCTTG   |     |              |
| <i>Oxidative stress genes</i>         | <i>Cat</i>      | F | CATAGACATCGTCTTGCCCC    | 101 | LOC443552    |
|                                       |                 | R | ATAGTCGCTTGCCATCACG     |     |              |
|                                       | <i>Sod1</i>     | F | GGTTGTACAAGTGTGGTGC     | 119 | LOC409398    |
|                                       |                 | R | GCAACACCACTTGCATCTGC    |     |              |
|                                       | <i>Tpx1</i>     | F | ACCAGTTGGGAGGTCTGTTG    | 93  | LOC409954    |
|                                       |                 | R | TTCCAGCCAGCTGGACATAC    |     |              |
|                                       | <i>Gtpx2</i>    | F | GGTCAAGAACCAGGAACCTC    | 134 | LOC726269    |
|                                       |                 | R | GCTTGTGTCTTCAACCACTTC   |     |              |
|                                       | <i>NOS</i>      | F | GGCGAATTAGGTGGAGAACG    | 99  | LOC503861    |
|                                       |                 | R | AGCAAAAGTATCGGCTGCCC    |     |              |

|                                  |              |   |                       |     |           |
|----------------------------------|--------------|---|-----------------------|-----|-----------|
| <i>Development-related genes</i> | <i>JhE</i>   | F | TACTGACGGTGAAAAAGCAGC | 148 | LOC406066 |
|                                  |              | R | ATCATCTGCATGACACACACC |     |           |
|                                  | <i>mTOR</i>  | F | GGTTGGGTACCGCATTGTGA  | 112 | LOC409393 |
|                                  |              | R | AACCTGGGGCCATTCTTAGC  |     |           |
|                                  | <i>IRS</i>   | F | CGCGATGCCAAGTCCATTAG  | 136 | LOC408438 |
|                                  |              | R | GAAGCCTTCTTGGGATGCTG  |     |           |
|                                  | <i>FoxO</i>  | F | TAGCTGGTAGCCTCGCAGAA  | 150 | LOC727091 |
|                                  |              | R | AGGACGATCCTGACGACAAG  |     |           |
|                                  | <i>Vg</i>    | F | TCAGTAACCAATGCGAGGGC  | 137 | LOC406088 |
|                                  |              | R | CGACATCTCGGTGTCCAATC  |     |           |
|                                  |              | R | CAGAATCAAGTGGCAGGCTTG |     |           |
| <i>Reference gene</i>            | <i>Actin</i> | F | CGAAAGATTCCGTTGTCCCG  | 147 | LOC406122 |
|                                  |              | R | CCAGAAAGGACAGTGTGGC   |     |           |
